# Supplementary material
Source: Research Square preprint supplement (doi:10.21203/rs.3.rs-9161842/v1)
Supplement: Supplementary file 1 [file 2ac7d57264df4252e10e6beb.docx]

A clinical, interventional, prospective, single-center, randomized, single-blind study was performed to evaluate the effect of NMES with the NEURODYN II (IBRAMED, Amparo, São Paulo, Brazil) device on lower limb hemodynamics and systemic fibrinolytic activity in 10 healthy subjects. The study protocol and informed consent were approved by the Research Ethics Committee of the Botucatu Medical School, UNESP, Brazil (CAAE: 30680120.0.0000.5411; Protocol No. 4.105.940). All subjects provided written informed consent prior to participation. All methods were performed in accordance with the relevant guidelines and regulations, including the Declaration of Helsinki and the CONSORT 2025 guidelines. This clinical trial was registered in the Brazilian Registry of Clinical Trials (ReBEC) under identifier RBR-6gs4bdh.
