# Supplementary material
Source: Research Square preprint supplement (doi:10.21203/rs.3.rs-9161842/v1)
Supplement: Supplementary file 2 [file 3d4bf4448f986a79a20d0b74.docx]

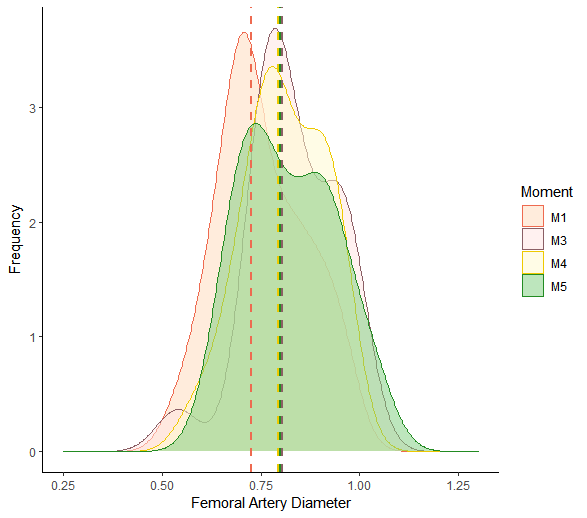


Supplemental Figure 1. Femoral artery diameter variation.


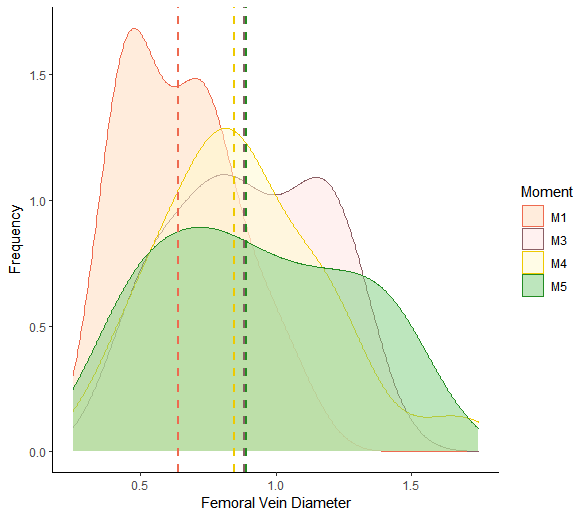


Supplemental Figure 2. Femoral vein diameter variation.


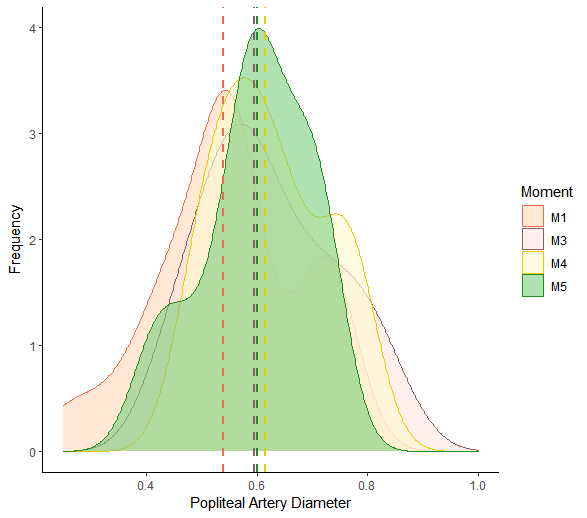


Supplemental Figure 3. Popliteal artery diameter variation.


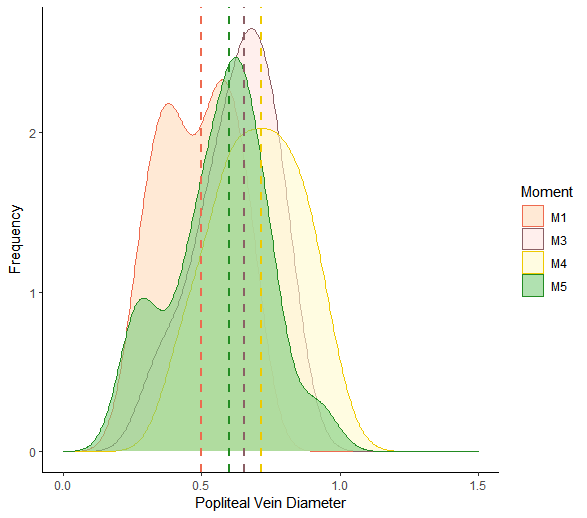


Supplemental Figure 4. Popliteal vein diameter variation.


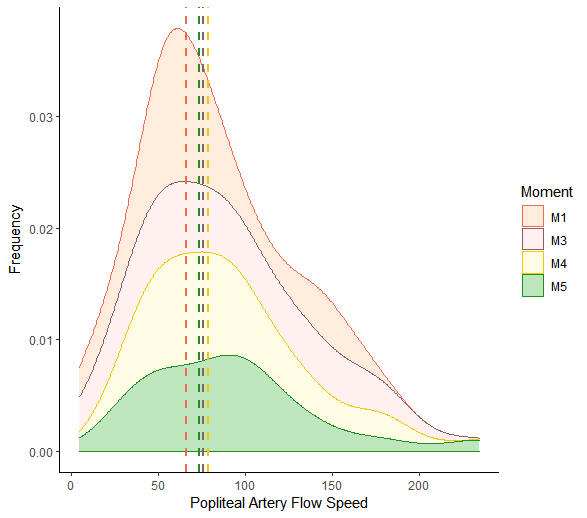


Supplemental Figure 5. Popliteal artery flow velocity variation


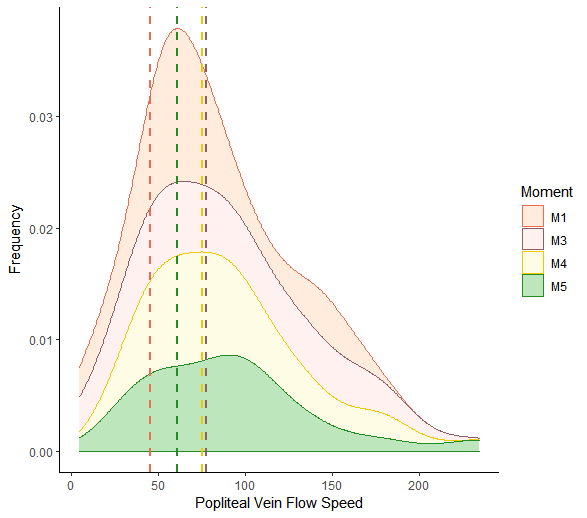


Supplemental Figure 6. Popliteal vein flow velocity variation


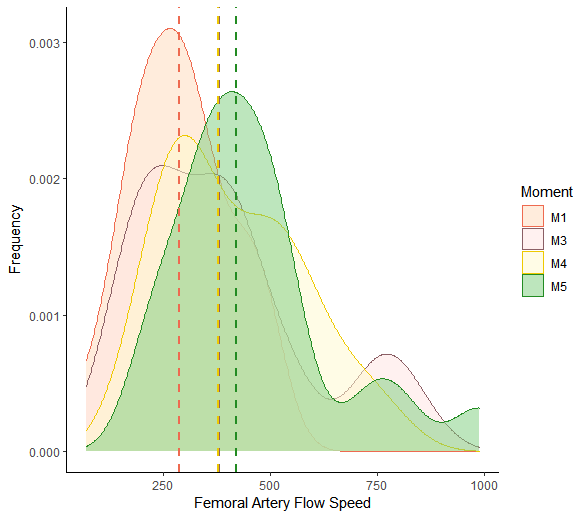


Supplemental Figure 7. Femoral artery flow velocity variation


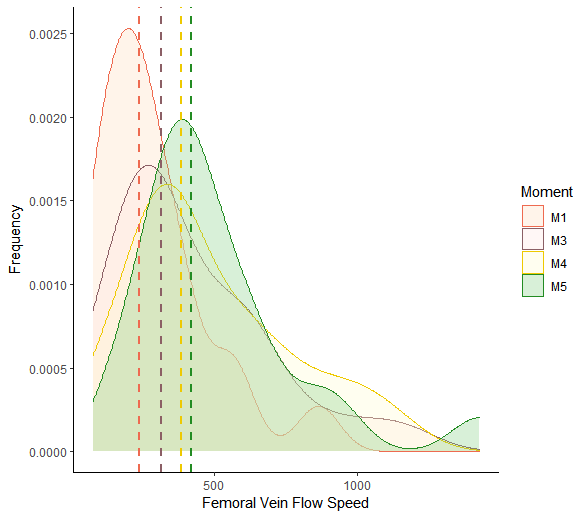


Supplemental Figure 8. Femoral vein flow velocity variation
