# Supplementary material
Source: Research Square preprint supplement (doi:10.21203/rs.3.rs-9161842/v1)
Supplement: Supplementary file 4 [file b1ef02a8840eb214a47c8813.docx]

Table I. Presentation of the significance of the distributions - the Friedman test, plasminogen activator and plasminogen activator inhibitor. * Significance at 5% (p-value<0.05); in bold the significant tests referring to moment 1. (.) No number assigned.

|  | **Moment** | **Significance per moment of stimulated members only** | | |
| --- | --- | --- | --- | --- |
| **P-value (Friedman test)** | | |
| **M1** | **M3** | **M4** |
| **Plasminogen activator** | **M1** | . | . | . |
| **M3** | 1 | . | . |
| **M4** | 1 | 1 | . |
| **M5** | 1 | 1 | 1 |
| **Activator Inhibitor** | **M1** | . | . | . |
| **M3** | 1 | . | . |
| **M4** | 1 | 1 | . |
| **M5** | 1 | 1 | 1 |

| Table II. Presentation of the significance of the distributions for the Wilcoxon and Friedman tests for flow volume. * Significance at 5% (p-value<0.05); in bold the significant tests referring to moment 1. (.) No number assigned. | |
| --- | --- |
| | **Flow Volume** | **Moment** | **Significance by moment all members** | | | **Significance per moment**  **members only**  **stimulated** | | | **Significance by moment only of non-stimulated members** | | | | --- | --- | --- | --- | --- | --- | --- | --- | --- | --- | --- | | **P-value (Friedman test)** | | | **P-value (Friedman test)** | | | **P-value (Friedman test)** | | | | **M1** | **M3** | **M4** | **M1** | **M3** | **M4** | **M1** | **M3** | **M4** | | **Femoral artery** | **M3** | 0,12 | . | . | 0,71 | . | . | 0,5 | . | . | | **M4** | 0,086 | 1 | . | 0,71 | 1 | . | 0,34 | 1 | . | | **M5** | 0,061 | 1 | 1 | 1 | 1 | 1 | 0,56 | 1 | 1 | | **Femoral vein** | **M3** | 1 | . | . | 1 | . | . | 1 | . | . | | **M4** | 0,95 | 1 | . | 0,34 | 1 | . | 1 | 1 | . | | **M5** | 1 | 1 | 1 | 1 | 1 | 1 | 1 | 1 | 1 | | **Popliteal artery** | **M3** | 0,3 | . | . | 1 | . | . | 0,34 | . | . | | **M4** | 0,35 | 1 | . | 0,5 | 0,71 | . | **0,034*** | 1 | . | | **M5** | 0,14 | 1 | 1 | 1 | 1 | 0,71 | 0,146 | 1 | 1 | | **Popliteal vein** | **M3** | 1 | . | . | 1 | . | . | 1 | . | . | | **M4** | **0,042*** | 0,3 | . | 1 | 1 | . | 0,23 | 1 | . | | **M5** | 1 | 1 | 0,042* | 1 | 1 | 1 | 1 | 1 | 0,15 | | | **Flow Volume** | **Significance of stimulation**  **Wilcoxon P-value test** | | --- | --- | | **Femoral artery** | 0,8835 | | **Femoral vein** | 0,165 | | **Popliteal artery** | 0,6635 | | **Popliteal vein** | 0,5992 | |

| Table III. Presentation of the significance of the distributions for the Wilcoxon and Friedman tests for vessel diameter. * Significance at 5% (p-value<0.05); in bold the significant tests referring to moment 1. (.) No number assigned. | |
| --- | --- |
| | **Vessel Diameter** | **Moment** | **Significance by moment all members** | | | **Significance per moment**  **members only**  **stimulated** | | | **Significance by moment only of non-stimulated members** | | | | --- | --- | --- | --- | --- | --- | --- | --- | --- | --- | --- | | **P-value (Friedman test)** | | | **P-value (Friedman test)** | | | **P-value (Friedman test)** | | | | **M1** | **M3** | **M4** | **M1** | **M3** | **M4** | **M1** | **M3** | **M4** | | **Femoral artery** | **M3** | **0,00019*** | . | . | 0,092 | . | . | 0,226 | . | . | | **M4** | 0,10157 | 0,45452 |  | 0,714 | 1 |  | 0,49959 | 1 | . | | **M5** | **0,00112*** | 1 | 1 | 0,146 | 1 | 1 | **0,00083*** | 0,49959 | 0,226 | | **Femoral vein** | **M3** | **0,0023*** | . | . | 0,714 | . | . | 0,092 | . | . | | **M4** | **0,0019*** | 1 | . | 0,092 | 1 | . | **0,011*** | 1 | . | | **M5** | **0,00088*** | 1 | 1 | 0,146 | 1 | 1 | **0,034*** | 1 | 1 | | **Popliteal artery** | **M3** | **0,035*** | . | . | 0,85 | . | . | 0,15 | . | . | | **M4** | 0,061 | 1 | . | 0,23 | 1 | . | 0,23 | 1 | . | | **M5** | 0,35 | 1 | 1 | 0,6 | 1 | 1 | 0,34 | 1 | 1 | | **Popliteal vein** | **M3** | **0,011*** |  |  | 0,0562 | . | . | 1 | . | . | | **M4** | **0,000047*** | 1 |  | **0,0017*** | 1 |  | 1 | 1 | . | | **M5** | 0,086 | 1 | 0,26 | 0,9951 | 1 | 0,1461 | 1 | 1 | 1 | |  |  |  |  |  |  |  |  |  |  |  | | | **Vessel diameter** | **Significance of stimulation**  **Wilcoxon P-value test** | | --- | --- | | **Femoral artery** | 0,9944 | | **Femoral vein** | 0,5452 | | **Popliteal artery** | 0,06432 | | **Popliteal vein** | 0,2314 | |

| Table IV . Presentation of the significance of the distributions for the Wilcoxon and Friedman tests for flow velocity. * Significance at 5% (p-value<0.05); in bold the significant tests referring to the moment 1. (.) No number assigned. | |
| --- | --- |
| | **Flow Speed** | **Moment** | **Significance by moment all members** | | | **Significance per moment**  **members only**  **stimulated** | | | **Significance by moment only of non-stimulated members** | | | | --- | --- | --- | --- | --- | --- | --- | --- | --- | --- | --- | | **P-value (Friedman test)** | | | **P-value (Friedman test)** | | | **P-value (Friedman test)** | | | | **M1** | **M3** | **M4** | **M1** | **M3** | **M4** | **M1** | **M3** | **M4** | | **Femoral artery** | **M3** | 0,1973 | . | . | 0,226 | . | . | 0,226 | . | . | | **M4** | **0,00871*** | 1 |  | 0,034 | 1 |  | 0,49959 | 1 | . | | **M5** | **0,00019*** | 1 | 1 | 0,226 | 1 | 1 | **0,00083*** | 0,49959 | 0,226 | | **Femoral vein** | **M3** | 0,224 | . | . | 1 | . | . | 0,15 | . | . | | **M4** | **0,0087*** | 1 | . | 1 | 1 | . | 0,23 | 1 |  | | **M5** | **0,0132*** | 1 | 1 | 0,71 | 1 | 1 | 0,34 | 1 | 1 | | **Popliteal artery** | **M3** | 0,52 | . | . | 1 | . | . | 1 | . | . | | **M4** | 0,4 | 1 | . | 1 | 1 | . | 0,85 | 1 | . | | **M5** | 0,4 | 1 | 1 | 1 | 1 | 1 | 0,22 | 1 | 1 | | **Popliteal vein** | **M3** | 1 |  |  | 1 | . | . | 1 | . | . | | **M4** | 0,67 | 1 |  | 1 | 1 |  | 1 | 1 | . | | **M5** | 1 | 1 | 1 | 1 | 1 | 1 | 1 | 1 | 1 | | | **Flow speed** | **Significance of stimulation**  **Wilcoxon P-value test** | | --- | --- | | **Femoral artery** | 0,4929 | | **Femoral vein** | 0,8785 | | **Popliteal artery** | 0,7146 | | **Popliteal vein** | **0.0408*** | |

|  |  |
| --- | --- |
