# Supplementary material
Source: Research Square preprint supplement (doi:10.21203/rs.3.rs-9161842/v1)
Supplement: Supplementary file 5 [file efc9c73c2856b96df4601d18.docx]

Supplemental Table I. Variation in activity and absorbance of the plasminogen activator inhibitor, compared to the M1 moment.

|  |  | M1 | M3 | M4 | M5 |
| --- | --- | --- | --- | --- | --- |
| Mean | Activity | 107 | 107 | 106,5 | 106,7 |
|  | M1 variation |  | 0 | -0,00467 | 0,0018779 |
|  | Absorbance | 312,675 | 312,984 | 313,841 | 313,992 |
|  | M1 variation |  | 0,09882% | 0,2738% | 0,04811% |
|  |  |  |  |  |  |
| Median | Activity | 107,5 | 108,5 | 107 | 105 |
|  | M1 variation |  | 0,0093023 | -0,01382 | -0,018692 |
|  | Absorbance | 310,7 | 309,13 | 312,715 | 318,39 |
|  | M1 variation |  | -0,5053% | 1,1597% | 1,81475% |

Supplemental Table II. Variation of plasminogen activator activity and absorbance, compared to M1 moment.

|  |  | M1 | M3 | M4 | M5 |
| --- | --- | --- | --- | --- | --- |
| Mean | Activity | 87,7 | 90,5 | 91,6 | 92,5 |
|  | M1 variation |  | 3,1927% | 4,44698% | 5,4732% |
|  | Absorbance | 1380,401 | 1425,706 | 1441,921 | 1452,792 |
|  | M1 variation |  | 3,282% | 4,45668% | 5,2442% |
|  |  |  |  |  |  |
| Median | Activity | 88,5 | 92 | 90,5 | 94 |
|  | M1 variation |  | 3,95% | 2,26% | 6,21% |
|  | Absorbance | 1392,775 | 1448,675 | 1425,87 | 1472,03 |
|  | M1 variation |  | 4,01% | 2,38% | 5,69% |
